# Supplementary material for: Dissipation Kinetics and the Pre-Harvest Residue Limits of Acetamiprid and Chlorantraniliprole in Kimchi Cabbage Using Ultra-Performance Liquid Chromatography-Tandem Mass Spectrometry
Source: Molecules. 2019 Jul 18;24(14):2616. doi: 10.3390/molecules24142616 (PMC6680825; doi:10.3390/molecules24142616)
Supplement: Supplementary file 1 [file molecules-24-02616-s001.pdf]

Supplemental data

# Dissipation Kinetics and the Pre-Harvest Residue Limits of Acetamiprid and Chlorantraniliprole in Kimchi Cabbage using Ultra-Performance Liquid Chromatography-Tandem Mass Spectrometry

Jonghwa Lee <sup>1,2,†</sup>, Byung Joon Kim <sup>1,†</sup>, Eunhye Kim <sup>1</sup> and Jeong-Han Kim <sup>1,\*</sup>

<sup>1</sup> Department of Agricultural Biotechnology and Research Institute of Agriculture and Life Sciences, Seoul National University, Seoul, 08826, Republic of Korea; payton20@snu.ac.kr (B. K.); cocopam777@snu.ac.kr (E. K.)

<sup>2</sup> Department of Veterinary and Animal Sciences, University of Massachusetts, Amherst, MA 01003, United States; jhlee006@gmail.com (J. L.)

\* These authors contributed equally to this paper as first author.

\* Correspondence: kjh2404@snu.ac.kr; Tel.: +82-2-880-4644

Received: date; Accepted: date; Published: date

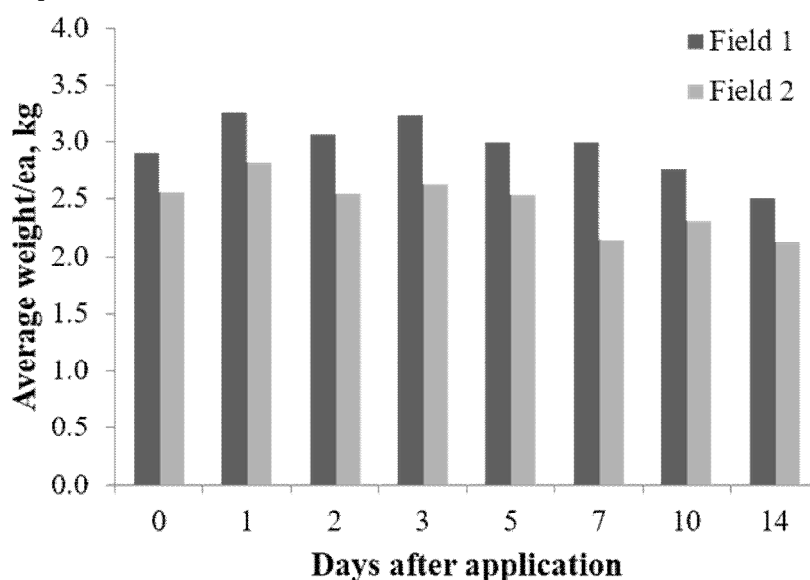

**Figure S1.** Average weight of the kimchi cabbages which were measured in each sampling day ( $n=3$ ).

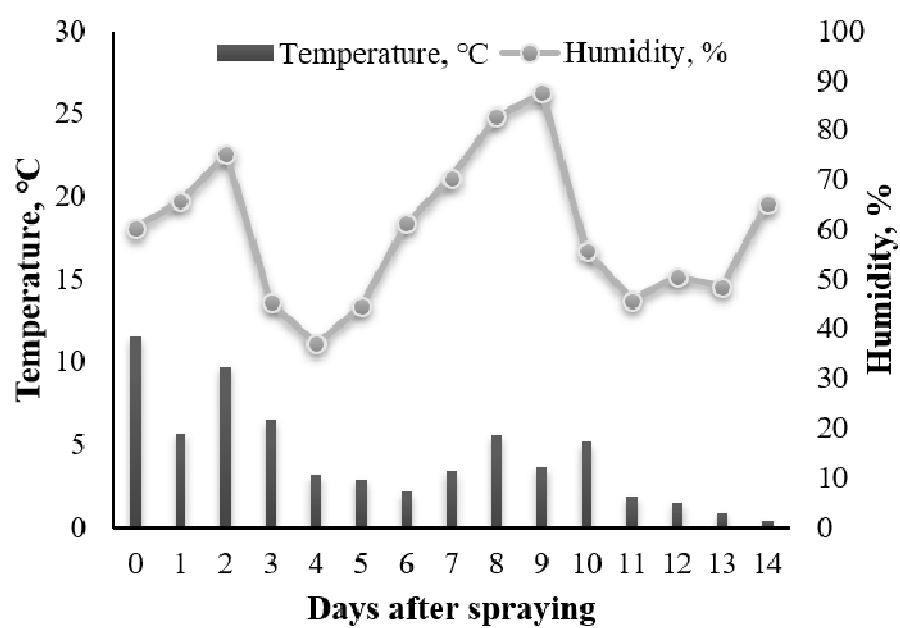

**Figure S2.** Temperature and humidity of the field (Icheon) during the experimental period
